# Supplementary material for: Single-mode Dispersion-engineered Nonlinear Integrated Waveguides for Ultra-broadband Optical Amplification and Wavelength Conversion
Source: Research Square preprint supplement (doi:10.21203/rs.3.rs-5153136/v1), 2024-10-07
Supplement: Supplementary file 1 [file f6792a760ccadccd93df14e5.docx]

**Supplementary Information - Single-mode Dispersion-engineered Nonlinear Integrated Waveguides for Ultra-broadband Optical Amplification and Wavelength Conversion**

Ping Zhao, Vijay Shekhawat, Marcello Girardi, Zonglong He, Victor Torres-Company, and Peter A. Andrekson

Photonics Laboratory, Department of Microtechnology and Nanoscience, Chalmers University of Technology
Gothenburg 41296, Sweden

**I. Balance between loss, nonlinearity and dispersion for parametric process**


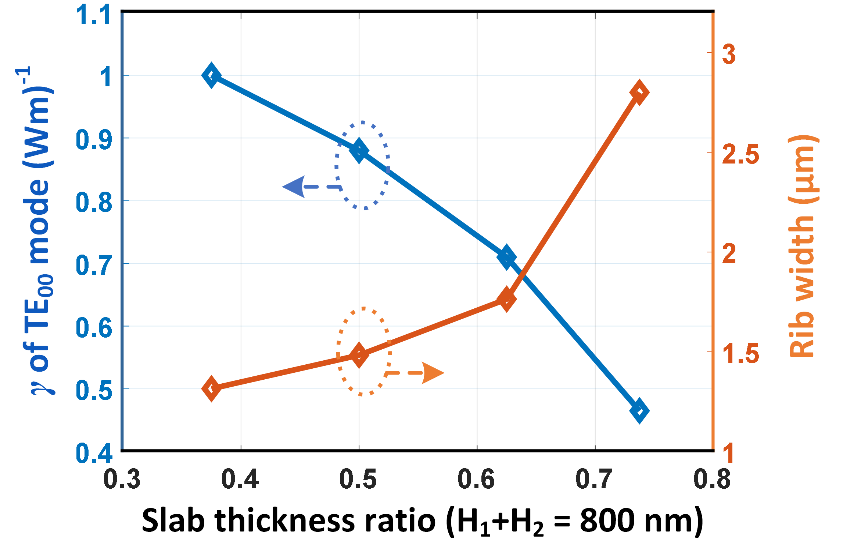
For the Si3N4 nonlinear platform, we find that anomalous dispersion is obtained mainly when the total thickness of the rib waveguide is more than 650 nm through typical simulations. Generally, the maximum thickness of crackless Si3N4 thin film we can achieve is about 800 nm via direct LPCVD on a flat silica substrate. Here, we focus on 800-nm-thick Si3N4 wafer. Although the confinement of the modes for this thickness may not be the highest, one advantage of maximizing the achievable waveguide thickness is that the bending technique of cutting off high-order modes in the rib Si3N4 waveguides would perform better for a moderate confinement. Figure S1 presents the simulated nonlinear coefficient (blue) of TE00 mode and required width (red) of a straight rib Si3N4 waveguide varying with the slab thickness ratio at a targeted zero-dispersion wavelength of 1550 nm. The total thickness of the rib Si3N4 waveguide, i.e., *H*1+*H*2, is 800 nm. As can be seen in Fig. S1, the required rib width increases with slab thickness. Besides, the nonlinear coefficient drops when the slab thickness ratio increases, which is attributed to the field confinement decrease. The propagation loss (*α*) of the rib Si3N4 waveguide we fabricated is mainly determined by the rib sidewall roughness as well as the overlap area between optical field and the sidewall [1][2], if the nanoparticle issue is fully solved. A higher slab thickness ratio would lead to a lower propagation loss which corresponds to a larger effective nonlinear length, *Leff*= (1-*e*-*αL*)/*α*, where *L* is the physical waveguide length [3]. At phase matching wavelengths, the gain of a waveguide parametric amplifier is proportional to the exponential term, [4]. As a result, a trade-off between nonlinearity and loss needs to be taken. We picked a slab ratio of 62.5%, i.e., *H*1 = 300 nm and *H*2 = 500 nm, for a strategy that the nonlinear coefficient is still large and the propagation loss would be small. Other slab ratios would be explored in our future work.

**Figure S1**. Nonlinear coefficient of TE00 mode (blue line) and required rib width (red line) varying with slab thickness ratio for a total rib Si3N4 waveguide thickness of 800 nm when the targeted zero-dispersion wavelength is 1550 nm.

**II. Single-mode maintaining in rib waveguides with finite slab width**


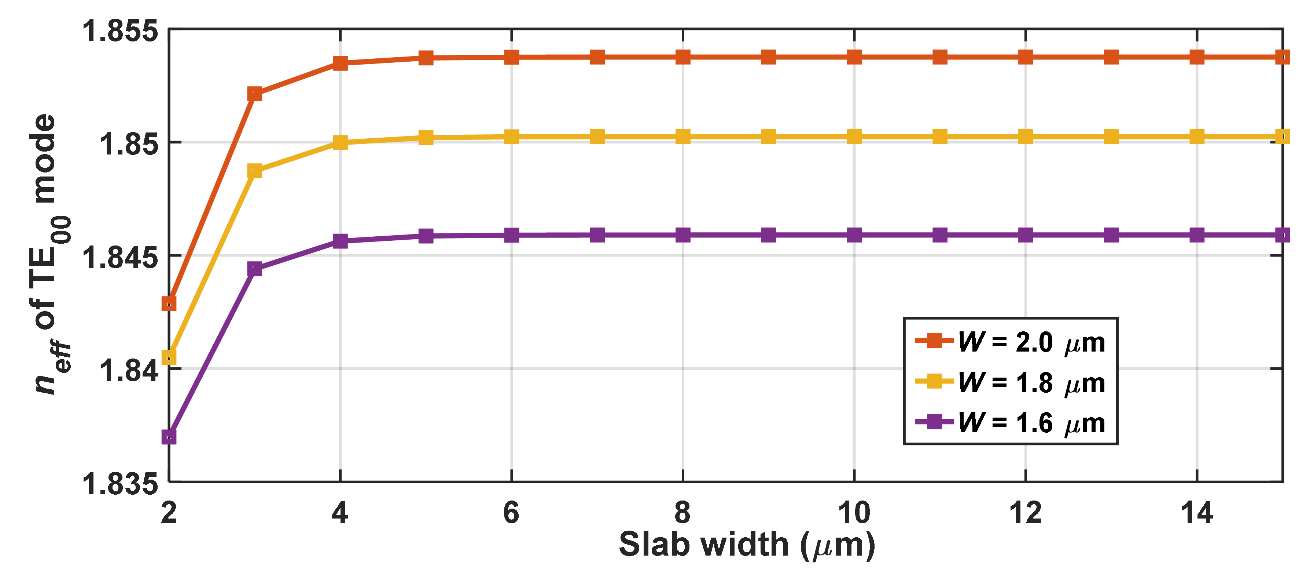
Ideally, A bent rib Si3N4 waveguide can be single mode if the slab is infinitely wide. When its thickness is more than 400 nm, practical Si3N4 slab is likely to crack due to huge temperature change during fabrication. In this work, we etched a part of the slab to release the stress of the Si3N4 slab and obtained sub-meter-long high-confinement rib Si3N4 integrated waveguides. As a result, the slab width is finite and slab modes are supported in the fabricated rib Si3N4 nonlinear integrated waveguides. The coupling between the fundamental and slab modes can be efficiently avoided by giving a wide Si3N4 slab. Figure S2 shows the simulated effective refractive index of TE00 mode as a function of the slab width of straight rib Si3N4 nonlinear integrated waveguides. The thicknesses of the rib and slab are 300 nm and 500 nm. The purple, yellow and red lines correspond to the rib width of 1.6 μm, 1.8 μm and 2.0 μm, respectively. As can be seen in Fig. S2, the TE00 effective refractive index is constant when the slab width is larger than 6 μm. This indicates that the TE00 mode will not be disturbed by the slab with a sufficiently large width. We optimized the nanofabrication processes and obtained smooth rib Si3N4 waveguides with slab widths of more than 12 μm, considering different bent radii. In this manner, single-mode transmission was achieved in the sub-meter-long rib Si3N4 nonlinear integrated waveguides.

**Figure S2.** Simulated effective refractive index of TE00 mode varying with the slab width of different straight rib Si3N4 nonlinear integrated waveguides at 1550 nm. The purple, yellow and red curves correspond to rib widths of 1.6 μm, 1.8 μm and 2.0 μm, respectively.

**III. Dispersion in a spiral rib waveguide**

The local radius of the proposed single-mode nonlinear waveguide changes along the waveguide. Figure S3 shows the simulated 2nd-order dispersion of TE00 mode varying with the radius of a rib Si3N4 nonlinear integrated waveguide at 1550 nm wavelength. The dimension parameters of the rib Si3N4 waveguide cross section are *W* = 1.9 μm, *H1* = 300 nm and *H2* = 500 nm. For the 56-cm-long single-mode rib Si3N4 nonlinear integrated waveguide used in the experiment, the radius of the 80% waveguide in one spiral unit is in the shallow-yellow regime. As can be seen in Fig. S3, the designed second- and fourth-order dispersion is about -4 ps2/km and 1.75 fs4/ μm, respectively, which is in good agreement with the FWM measurements. Besides, the second-order dispersion is more sensitive to the bent radius of the ribSi3N4 nonlinear integrated waveguide than the fourth-order dispersion. We tried to use large bent radius to reduce the dispersion variation along the waveguide. Currently, the maximum radius is limited by the EBL writing field, i.e., 1 mm x 1 mm.


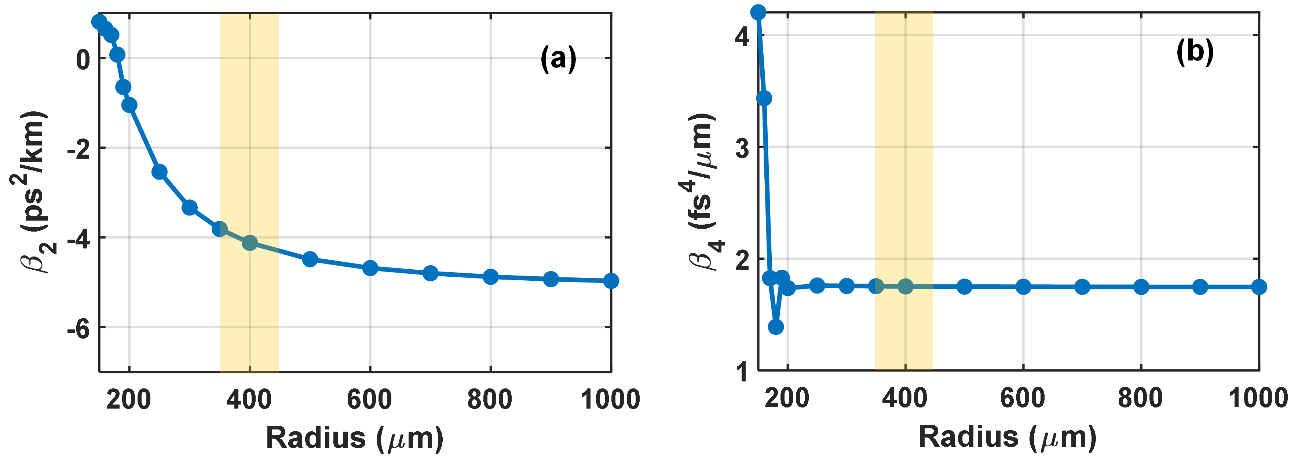
**IV. Ultra-wideband PF spectra**

**Figure S3.** (a) Second- and (b) fourth-order dispersion as a function of the radius of a rib Si3N4 nonlinear integrated waveguide at 1550 nm for TE00 mode. The waveguide parameters of the cross section are W = 1.9 μm, H1 = 300 nm and H2 = 500 nm. The shallow-yellow regime corresponds to the radius range of eighty percent of the waveguide.


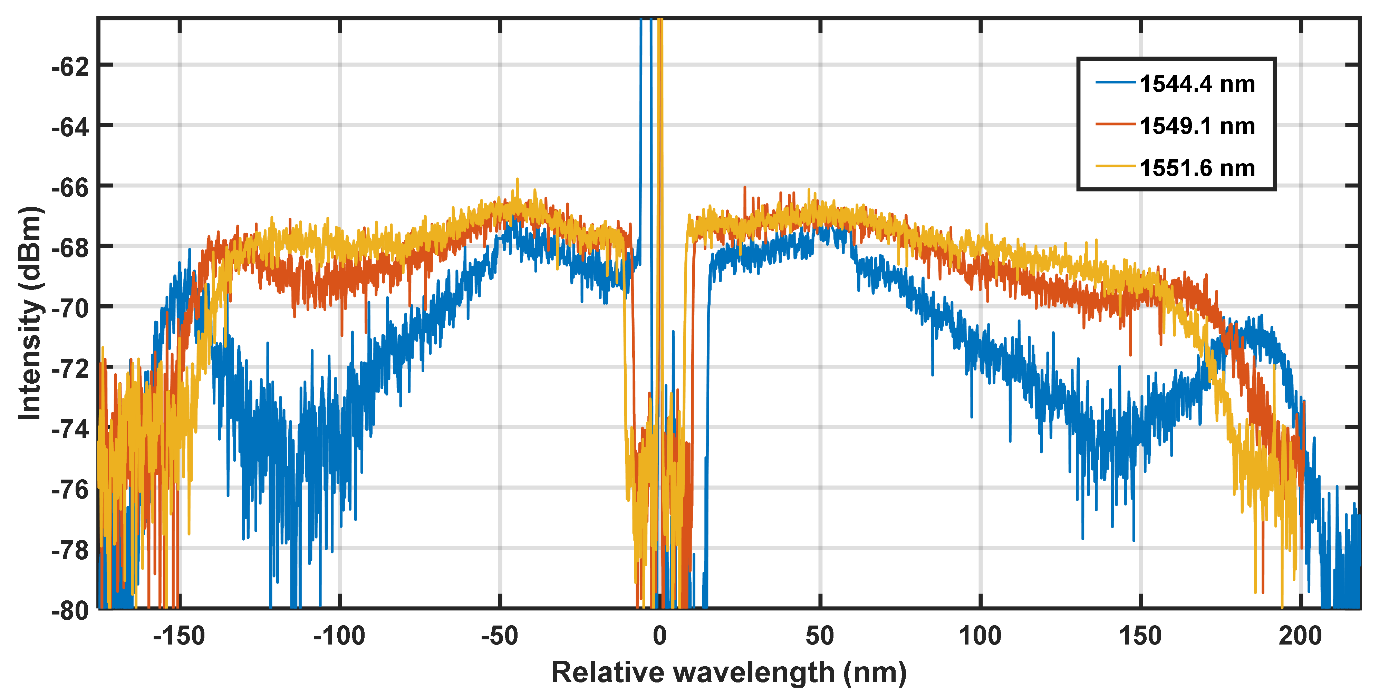
Although we used three widely wavelength-tunable ECLs (1355 nm ~ 1495 nm, 1480 nm ~ 1640 nm and 1580 nm ~ 1680 nm) for the FWM characterization, the measurement of the full parametric bandwidth of the 56-cm-long single-mode rib Si3N4 nonlinear integrated waveguide can still not be made due to limited single laser wavelength range. An alternative method to estimate the parametric bandwidth is to check the PF spectrum of the Si3N4 nonlinear integrated waveguide. By only feeding the continuous-wave pump wave into the Si3N4 nonlinear integrated waveguide, we achieved pure PF due to spontaneous FWM emission in the Si3N4 nonlinear waveguide. Figure S4 shows the PF spectra with pump wavelengths of 1544.4 nm (blue), 1549.1 nm (red) and 1551.6 nm (yellow). The on-chip pump power was about 34 dBm in TE00 mode. The two PF peaks at the spectrum edges correspond to phase match wavelengths due to fourth-order dispersion for the 1544.4 nm pump wavelength. As is shown in Fig. S4, the PF flatness improves when the pump wavelength increases. The second- and fourth-order dispersion changes with the pump wavelength, which can be seen in Fig. E1 (a) and (b). Hence, there is an optimum pump wavelength to obtain a spectrally flat PF. The improvement of PF flatness is in agreement with theoretical expectations shown by Fig. 2(a). The PF flatness was also affected by the integrated tapers which were mainly optimized in the C and L bands.

**Figure S4**. Measured PF spectra with pump wavelengths of 1544.4 nm (blue), 1549.1 nm (red) and 1551.6 nm (yellow). The resolution of optical spectrum analyzer was 0.2 nm. The on-chip pump power was 34 dBm.

**Reference**

[1] F. P. Payne and J. P. R. Lacey, “A theoretical analysis of scattering loss from planar optical waveguides,” *Opt. Quantum Electron.*, vol. 26, p. 977, 1994.

[2] K. K. Lee, D. R. Lim, H.-C. Luan, A. Agarwal, J. Foresi, and L. C. Kimerling, “Effect of size and roughness on light transmission in a Si/SiO2 waveguide: Experiments and model,” *Applied Physics Letters*, vol. 77, no. 11, pp. 1617–1619, Sep. 2000, DOI: 10.1063/1.1308532.

[3] G. Agrawal, *Nonlinear Fiber Optics*, Elsevier, 2013. DOI: 10.1016/b978-0-12-397023-7.00016-4.

[4] M. Karlsson, J. Schröder, P. Zhao, and P. A. Andrekson, “Analytic theory for parametric gain in lossy integrated waveguides,” in *Conference on Lasers and Electro-Optics*, San Jose, California, United States, 2021, p. JTh3A.5.
